# Supplementary material for: A novel approach to modelling transcriptional heterogeneity identifies the oncogene candidate CBX2 in invasive breast carcinoma
Source: PubMed Central journal article supplement (PMC6462018; doi:10.1038/s41416-019-0387-8), 2019-03-01
Supplement: 41416_2019_387_MOESM1_ESM.pdf [file 41416_2019_387_MOESM1_ESM.pdf]

1           **Supplementary information for “A novel approach to modeling transcriptional**  
2           **heterogeneity identifies the oncogene candidate *CBX2* in invasive breast carcinoma”**

3           **Supplementary Methods**

4  
5           *Estimation of mixture model parameters*

6           To investigate whether certain genes expressed in tumors exhibited distinct, clearly  
7           separable clusters of gene expression values, a 2-component Gaussian mixture model was fit to  
8           each gene across the 110 data points. These mixture models were applied separately for gene  
9           expression values from both tumors and adjacent normal samples. For each gene within each  
10          group (either tumor or adjacent normal), 4 parameters – namely, the mean of the Gaussian with  
11          the lower ( $\mu_L$ ) and higher ( $\mu_H$ ) mean, the proportion of samples under the Gaussian with the  
12          smaller of the two means ( $\pi$ ), and a common standard deviation ( $\sigma$ ) – were estimated using  
13          maximum likelihood through the well-established method of expectation maximization<sup>1</sup> (**Figure**  
14          **1B**). The variance of the mixture model was set to be equal between the two Gaussians to  
15          stabilize the expectation maximization procedure. Each parameter includes an additional letter  
16          subscript (“T” or “N”) to denote whether the parameter refers to the model describing the tumor  
17          (T) or adjacent normal (N) expression data.

18  
19          *Selection and filtration of genes*

20          To remove genes with extreme outliers and to allow for sufficient statistical power for  
21          downstream analysis, genes with a proportion of low-expression modal membership between 0.2  
22           $> \pi_T$  &  $\pi_N > 0.8$  were selected. Additional filtering of genes was performed as described in  
23          **Figure 1B**. To identify and rank genes whose expression values defined a distinct subgroup of

24 tumors that overexpressed the gene relative to normal tissue, two statistics was derived from the  
 25 mixture model parameters. The first, termed the selectivity index (*SI*), was used to screen  
 26 candidate genes with an overexpressed subgroup of tumors and was defined as follows:

$$27 \quad SI = \frac{1}{n} \sum_{i=1}^n \begin{cases} 1, & \text{if } x_i < \frac{\mu_{LT} + \mu_{HT}}{2} \\ 0, & \text{otherwise} \end{cases} \quad \text{(Equation 1)}$$

28 where  $n$  is the number of paired samples with gene expression values (here,  $n = 110$ ),  $x_i$  is the  
 29  $\log_2(\text{TPM}+1)$  expression value of the  $i^{\text{th}}$  adjacent normal sample, and  $\frac{\mu_{LT} + \mu_{HT}}{2}$  is the boundary,  
 30 or point of equal probability, between the low and high expression modes of the Gaussians that  
 31 describe the tumor data. The SI is applied separately to each gene and ranges between 0 and 1,  
 32 with values closer to 1 indicative of genes that have a subpopulation of samples that are clearly  
 33 distinct and separable based on the expression values from tumors for a given gene. The SI is  
 34 unique in that it selects genes that define distinct clusters of tumor samples based on expression  
 35 values that are separate from and greater than their adjacent normal counterparts as well as from  
 36 other tumor samples. After visually inspecting the distribution of SI values for all genes (**Figure**  
 37 **1A**) a conservative SI cutoff of 0.99 was selected.

38 The second statistic that was developed was termed the oncomix score. The oncomix  
 39 score is calculated as a function of the SI (see Equation 1) and the  $\Delta\mu_H, \Delta\mu_L, \sigma_N, \sigma_T$  parameters,  
 40 as shown below:

$$41 \quad \text{Oncomix Score} = SI * \{(\Delta\mu_H - \Delta\mu_L) - (\sigma_N + \sigma_T)\} , \quad \text{(Equation 2)}$$

42 where  $\Delta\mu_H = \mu_{HT} - \mu_{HN}$  and is the difference between the means of the high expression groups of  
 43 the mRNA values from tumor ( $\mu_{HT}$ ) and adjacent normal tissue ( $\mu_{HN}$ ). This term, when large,  
 44 indicates greater separation between the high expression modes of the tumor and adjacent normal  
 45 populations and would contribute to a larger and more favorable oncomix score. The difference

46 between the low expression groups of the tumor ( $\mu_{LT}$ ) and adjacent normal samples ( $\mu_{LN}$ ) was  
47 calculated as  $\Delta\mu_L$  ( $\mu_{LT} - \mu_{LN}$ ). This term, when small, indicates a minimal difference between the  
48 low expression modes of the tumor and adjacent normal populations and results in a larger  
49 oncomix score. The oncomix score is penalized by the variance of each mixture model  
50 ( $\sigma_N$  &  $\sigma_T$ ), with larger variances resulting in lower scores. This is because mixture models with  
51 large variances reflect an underlying spread in the distribution and provide evidence against the  
52 existence of two distinct clusters of tumor expression data, and of a single cluster of normal  
53 tissue data.

#### 54 *Identification of a subset of existing oncogenes that are overexpressed in a subset of tumors*

55 While oncomix was primarily intended to discover novel oncogenes, it was also  
56 imperative to evaluate whether our method could recover any well-established oncogenes. To do  
57 this, all Tier 1 oncogenes were used from the Cancer Gene Census (CGC) database (196  
58 genes)<sup>2,3</sup>, a collection of genes with mutations that are causally associated with cancer derived  
59 from all tumor types. Of the 196 Tier 1 oncogenes from the CGC, twelve genes (6.1%) had an SI  
60  $> 0.99$  and an oncomix score  $> 0$  (**Supplementary Figure 1**). The gene expression distributions  
61 of these twelve genes in the matched tumor-normal samples from the TCGA breast cancer  
62 patients showed that most of these distributions contained a subset of tumors that overexpressed  
63 the given gene relative to normal tissue (**Supplementary Figure 1**). Of these twelve genes, five  
64 (*HOXA13*, *TAL2*, *SOX2*, *HOXD13*, and *SALL4*) are transcription factors that help govern  
65 embryonic mammalian development and are transcriptionally silent in most adult tissues<sup>4-7</sup>  
66 (**Supplementary Figure 14**). We conclude that our approach successfully identified a small  
67 subset of known oncogenes whose function may be mediated through gene overexpression.

#### 68 *Power analysis*

69 Oncomix provides a way for users to rank oncogene candidates within a cancer dataset  
70 based on patterns of gene expression between tumor and adjacent normal tissue. Because  
71 oncomix is not based on hypothesis testing, deriving exact power calculations for this approach  
72 is non-standard and difficult. To work around this, we conducted a simulation study to estimate  
73 the power of the oncomix approach based on the design parameters used in our study. Here, the  
74 null hypothesis is defined as there being no significant difference in the oncomix score of the top  
75 5 ranked oncogene candidates relative to the rest of the 134 genes that passed the initial filters  
76 ( $0.2 > \pi_T$  &  $\pi_N > 0.8$ , selectivity index  $> 0.99$ ). Power is defined as the probability of rejecting  
77 the null hypothesis when the null hypothesis is incorrect. Therefore, the alternative hypothesis is  
78 that the oncomix scores of the top 5 ranked oncogene candidates are significantly higher than  
79 those genes not ranking in the top 5.

80 Oncomix scores were simulated by assuming that 4 main parameters (SI,  $\Delta\mu_H$ ,  $\Delta\mu_L$ ,  $\sigma_N$ ,  
81  $\sigma_T$ ) comprising the oncomix score from the two groups (top 5 genes versus bottom 134 genes)  
82 were drawn from two separate multivariate Gaussian distributions. A 5<sup>th</sup> parameter, the SI, was  
83 simulated using a bootstrap approach due to the narrow support and non-Gaussianity of this  
84 parameter. Parameters for these distributions were estimated from the observed data and were fit  
85 using the mvnorm function in the MASS library in R<sup>8</sup>. With a sample size of 110 adjacent  
86 normal and tumor samples, and at an alpha level of  $1.91 \times 10^{-6}$  (student's 1-sided t-test), the power  
87 to correctly reject the null hypothesis is 0.723 (out of 1000 simulations) (**Supplementary Figure**  
88 **2**).

89

90 **The oncogene candidates identified by oncomix represent a unique set of genes that are not**  
91 **reliably detectable by existing approaches.**

92 For an oncogene candidate to be detected by oncomix, a gene must exhibit a specific  
93 expression profile that demonstrates overexpression in a subgroup of cancer patients (**Figure**  
94 **1B**). To test whether genes identified by oncomix could be identified by existing approaches, we  
95 compared our results with those obtained by two other methods to find potential tumor  
96 regulators. Limma is a widely-used method to identify differentially-expressed (DE) genes  
97 through a regularized Student's two sample t-test and assumes the presence of a single mode of  
98 expression. None of the genes identified by oncomix fell within the top 2% of genes ranked by  
99 limma (**Supplementary Table 1** and Methods). In addition, benchmarking was performed  
100 against mCOPA, a method that ranks a subset of genes based on meeting a fold change threshold  
101 between pre-specified percentiles from expression profiles in tumor and normal samples<sup>7</sup>.  
102 mCOPA ranked only one out of our five identified OCs, even after pre-specifying three different  
103 percentiles (see Methods). The genes that were highly ranked by these methods are shown in  
104 **Supplementary Figure 3** (compare with **Figure 2B**). We conclude that our method detects  
105 unique genes with established roles in oncogenesis and metastasis for a subset of patients, and  
106 that these genes are not detectable using existing DE methods that compare tumor and adjacent  
107 normal samples.

108

#### 109 *Supplemental molecular and clinical datasets*

110 All supplemental data were downloaded from GDC servers using the  
111 GenomicDataCommons and TCGAbiolinks R packages (see **Supplementary File 2**, section  
112 "Summary of Data sources" for details on downloaded files). 75% (82/110) of tumor samples in  
113 this study also had DNA methylation data processed on Illumina 450k arrays that was obtained  
114 from the same tumor. The FDb.InfiniumMethylation.hg19 R package was used to obtain 450k

115 CpG coordinates for hg19, which were mapped to hg38 using the rtracklayer R package<sup>9,10</sup>. DNA  
116 CpG methylation loci beta values were obtained from Illumina 450k arrays (see **Supplementary**  
117 **Figure 4**). For the logistic regression analysis, only those CpG methylation loci from the  
118 TSS1500 to the 3' UTR within each respective oncogene candidate were used. The  
119 TxDb.Hsapiens.UCSC.hg38.knownGene R package was used to obtain the genomic coordinates  
120 for each oncogene candidate<sup>11</sup>. Log<sub>2</sub> mean segment copy number values for CNV obtained from  
121 an Affymetrix 6.0 SNP array were utilized. Clinical data was numerically codified or scaled to  
122 within a range of 0-1, and the molecular subtype was inferred from the log<sub>2</sub>(TPM+1) mRNA  
123 expression data from each tumor using the AIMS algorithm<sup>12</sup>.

124 All 66 transcription factor and histone ChIP-seq data from MCF7 cells with 2 biological  
125 or technical replicates was downloaded from ENCODE servers using the 'rutils' tool in April  
126 2017. All downloaded data was aligned to hg38, and peaks were called using standard ENCODE  
127 processing pipelines<sup>13,14</sup>. Of the 66 ENCODE data sets, 14 (three transcription factors and 11  
128 histones) overlapped with at least one CpG site within the *CBX2* locus. From these 14 ChIP-seq  
129 data sets, seven ChIP-seq experiments were manually selected based on their established  
130 association with transcriptional regulation<sup>14</sup>.

131

132

| Gene symbol  | Function (NCBI gene summary)                                          | Chromosome   | Oncomix score/ Rank | Limma Rank (out of 7,388 upregulated genes) | mCOPA Rank (out of 2,152 ranked genes) |
|--------------|-----------------------------------------------------------------------|--------------|---------------------|---------------------------------------------|----------------------------------------|
| EPYC         | Member of the small leucine-rich repeat proteoglycan family           | 12q21.33     | 1.84 / 1            | 279                                         | NA                                     |
| <i>NELL2</i> | Neural epidermal growth factor-like like protein 2                    | 12q12        | 1.64 / 2            | 2264                                        | NA                                     |
| <i>CBX2</i>  | Member of polycomb repressive complex                                 | 17q25.3      | 1.48 / 3            | 756                                         | NA                                     |
| SLC24A2      | Member of calcium/cation antiporter superfamily of transport proteins | 9p22.1-p21.3 | 1.40 / 4            | 149                                         | NA                                     |
| LAG3         | Lymphocyte-activation protein 3                                       | 12p13.31     | 1.28 / 5            | 3077                                        | 1076                                   |

134 **Supplementary Table 1. List of oncogene candidate function and comparison with current**  
135 **differential expression approaches.** Each oncogene candidate is represented by a row. Columns  
136 indicate the molecular features or function of each gene. A rank-based comparison between the  
137 oncomix score, limma's p-value, and mCOPA's fold change is shown. Genes with a selectivity  
138 index > 0.99 were ranked according to the oncomix score. A limma rank of 1 is assigned to the  
139 gene that was most differentially expressed (ie has the lowest p-value) between tumors and  
140 adjacent normal samples, and a limma rank of 7,388 is the lowest possible rank and indicates the  
141 gene that was least differentially upregulated in tumors relative to normal tissue. mCOPA  
142 identified 2,152 genes that contained overexpressed outliers after selecting genes that had at least  
143 a  $\log_2(\text{fold change}) > 2$  between tumor and normal samples at the 70<sup>th</sup>, 80<sup>th</sup>, or 90<sup>th</sup> percentile.  
144 Genes were ranked according to  $\log_2(\text{fold change})$ . NA indicates that the gene was not selected  
145 by mCOPA.

146

147

148

| <b>Oncogene Candidate</b> | <b>Upregulated genes</b> | <b>Downregulated genes</b> |
|---------------------------|--------------------------|----------------------------|
| <i>EPYC</i>               | 4                        | 0                          |
| <i>NELL2</i>              | 0                        | 0                          |
| <i>CBX2</i>               | 73                       | 17                         |
| <i>SLC24A2</i>            | 241                      | 1                          |
| <i>LAG3</i>               | 105                      | 2                          |

149

150 **Supplementary Table 2. Summary of differentially expressed genes in breast tumors that**  
151 **overexpress oncogene candidate mRNA** Each oncogene candidate is represented as a row. The  
152 number of upregulated and downregulated genes are relative to tumors that overexpress the  
153 oncogene candidate. Differential expression was performed using limma with  $\log_2(\text{Fold Change})$   
154  $> 1$  &  $q\text{-value} < 0.0001$  as cutoffs.

155

156

157

| Oncogene Candidate | Geneset                                    | q value  | Odds Ratio | Odds Ratio 95% CI |
|--------------------|--------------------------------------------|----------|------------|-------------------|
| <i>CBX2</i>        | hallmark g2m checkpoint                    | 2.20E-30 | 54         | 31-91             |
| <i>CBX2</i>        | hallmark e2f targets                       | 1.30E-25 | 44         | 25-75             |
| <i>SLC24A2</i>     | hallmark epithelial mesenchymal transition | 1.30E-59 | 37         | 26-53             |

159 **Supplementary Table 3. Gene set enrichment from upregulated genes in breast tumors that**  
160 **overexpress a given OC.** Two OCs had significant enriched pathways following gene set  
161 enrichment performed using Fisher's exact test. Pathways are shown as rows. Pathways that have  
162 an odds ratio with a lower bound 95% CI > 20 and a Benjamini-Hochberg adjusted q-value <  
163  $1 \times 10^{-20}$  are shown and are ranked, from top to bottom, by decreasing odds ratio within each OC.

| HGNC symbol   | Description                                               | log <sub>2</sub> (Fold Change) | q value  | Chromosome |
|---------------|-----------------------------------------------------------|--------------------------------|----------|------------|
| <i>KIF2C</i>  | kinesin family member 2C                                  | 1.55                           | 1.30E-06 | 1p34.1     |
| <i>RAD54L</i> | RAD54 like                                                | 1.26                           | 5.80E-06 | 1p34.1     |
| <i>CDC20</i>  | cell division cycle 20                                    | 1.63                           | 9.30E-06 | 1p34.2     |
| <i>E2F2</i>   | E2F transcription factor 2                                | 1.14                           | 9.14E-05 | 1p36.12    |
| <i>EXO1</i>   | exonuclease 1                                             | 1.3                            | 6.97E-05 | 1q43       |
| <i>CENPA</i>  | centromere protein A                                      | 1.59                           | 7.00E-07 | 2p23.3     |
| <i>BUB1</i>   | BUB1 mitotic checkpoint serine/threonine kinase           | 1.35                           | 6.30E-06 | 2q13       |
| <i>CENPE</i>  | centromere protein E                                      | 1.09                           | 6.48E-05 | 4q24       |
| <i>CCNA2</i>  | cyclin A2                                                 | 1.29                           | 5.55E-05 | 4q27       |
| <i>MAD2L1</i> | mitotic arrest deficient 2 like 1                         | 1                              | 8.91E-05 | 4q27       |
| <i>TTK</i>    | TTK protein kinase                                        | 1.29                           | 1.06E-05 | 6q14.1     |
| <i>EZH2</i>   | enhancer of zeste 2 polycomb repressive complex 2 subunit | 1.01                           | 1.26E-05 | 7q36.1     |
| <i>CDK1</i>   | cyclin dependent kinase 1                                 | 1.17                           | 7.80E-05 | 10q21.2    |
| <i>TROAP</i>  | trophinin associated protein                              | 1.35                           | 1.07E-05 | 12q13.12   |
| <i>ESPL1</i>  | extra spindle pole bodies like 1, separase                | 1.17                           | 3.66E-05 | 12q13.13   |
| <i>PLK1</i>   | polo like kinase 1                                        | 1.42                           | 1.37E-05 | 16p12.2    |
| <i>ORC6</i>   | origin recognition complex subunit 6                      | 1.08                           | 2.86E-05 | 16q11.2    |
| <i>SLC7A5</i> | solute carrier family 7 member 5                          | 1.63                           | 6.07E-05 | 16q24.2    |
| <i>BIRC5</i>  | baculoviral IAP repeat containing 5                       | 1.65                           | 1.30E-06 | 17q25.3    |
| <i>NDC80</i>  | NDC80, kinetochore complex component                      | 1.18                           | 5.77E-05 | 18p11.32   |
| <i>CDC25B</i> | cell division cycle 25B                                   | 1.14                           | 2.86E-05 | 20p13      |
| <i>TPX2</i>   | TPX2, microtubule nucleation factor                       | 1.44                           | 1.14E-05 | 20q11.21   |
| <i>E2F1</i>   | E2F transcription factor 1                                | 1.27                           | 3.27E-05 | 20q11.22   |
| <i>MYBL2</i>  | MYB proto-oncogene like 2                                 | 2.06                           | 1.30E-06 | 20q13.12   |
| <i>UBE2C</i>  | ubiquitin conjugating enzyme E2 C                         | 1.64                           | 1.58E-05 | 20q13.12   |
| <i>AURKA</i>  | aurora kinase A                                           | 1.42                           | 3.10E-06 | 20q13.2    |
| <i>CDC45</i>  | cell division cycle 45                                    | 1.25                           | 4.00E-05 | 22q11.21   |

165 **Supplementary Table 4. Significantly differentially expressed and upregulated genes within**  
166 **the Hallmark G2/M checkpoint pathway for tumors that overexpress *CBX2*.** Each gene is  
167 listed as a row, and a description is provided for each gene from the Hugo Gene Nomenclature  
168 Committee (HGNC), along with the log<sub>2</sub>(Fold Change), Benjamini-Hochberg adjusted q value,  
169 and chromosomal location. The genes are listed from top to bottom in order of chromosomal  
170 location. All genes listed have a log<sub>2</sub>(Fold Change) > 1 & q-value < 0.0001.

171

172

173

174

175

176

177



178

179 **Supplementary Figure 1. Oncogenes from the Cancer Gene Census can be detected using**  
180 **oncomix.** A) The distribution of selectivity indices across 196 oncogenes from the CGC is  
181 shown. B) Distribution of oncomix scores for the same 196 oncogenes separated by their  
182 selectivity index. Dark red bars indicate the genes that have a selectivity index greater than 0.99  
183 (N=15). C) Superimposed histograms of expression values from tumor (teal) and adjacent  
184 normal (red) samples for the 12 oncogenes with oncomix score greater than 0 and a selectivity  
185 index greater than 0.99. The best fitting mixture model is shown for each selected gene. The  
186 HUGO gene symbol for each gene is displayed for each histogram. The y-axis represents density  
187 and the x-axis represents  $\log_2(\text{TPM} + 1)$  reads. Tumor samples are shown in teal, and adjacent  
188 normal breast tissue is shown in orange. Abbreviations: TPM = Transcripts Per Million reads.

189

190

191

192



193

194 **Supplementary Figure 2. Power analysis based on simulations of observed oncomix**  
 195 **parameter values.** The x-axis shows the p-value (log<sub>10</sub> scale), and the y-axis represents the  
 196 power. Each black point represents the power along a grid of p-values between 1 × 10<sup>-6</sup> and 0.05  
 197 with each step of size 1 × 10<sup>-6</sup>. The vertical red line represents the observed p-value (1.91 × 10<sup>-6</sup>)  
 198 (Student's 1-sided t-test) in this study, and the blue line represents a p-value of 0.05.

199

200

201



202

203

204

205

206

207

208

209

210

211

212

213

**Supplementary Figure 3. Comparison of the distributions from the 5 top genes (out of 16,156) identified from 2 different types of differential expression approaches.** The distributions of  $\log_2$ -transformed transcripts per million reads for 110 tumor (teal) and adjacent normal (red) samples are shown along the x-axis. The y-axis represents density. (Top Row) Differential expression analysis between tumor and adjacent normal samples using limma, a technique that performs a two-sample t-test. The top 5 genes with the lowest p-value among 16,156 genes are shown, and genes are shown from left to right by progressively increasing p-value. (Bottom row) The top 5 genes derived from mCOPA analysis of tumor and adjacent normal samples with the highest  $\log_2$  fold change between the 80<sup>th</sup> percentile for tumor and adjacent normal samples are shown.  $\log_2$  fold change was calculated based on COPA-transformed expression values, which are not shown here.

214



216  
217  
218  
219  
220  
221  
222  
223  
224  
225  
226  
227  
228  
229  
230  
231  
232  
233  
234

**Supplementary Figure 4. Overview of study design and schematic of molecular and clinicopathologic data matrix organization.** All data were downloaded from the Genomic Data Commons/Cancer Genome Atlas (TCGA) and were organized into distinct matrices based on the type of data (RNA sequencing, DNA methylation, genomic copy number, and clinicopathologic information). Representative examples of TCGA patient IDs (rows) and of the 4 distinct data types (columns) are shown. Patients were selected using the following 2 criteria: 1) no prior chemotherapeutic treatment for invasive breast carcinoma, and 2) the presence of RNA sequencing data from both tumor and adjacent normal tissue. The values of the entries for each of the 4 matrices are shown below each respective matrix, along with the dimension of each matrix. Individual probes or genes were filtered according to the criteria indicated in the ‘filter’ row. Code for organization of data matrices is available on Github. Where appropriate, matching annotation files (not shown) were created using UCSC genome annotations (hg38) for transcription start and end sites, DNA methylation loci, and SNP locations. Abbreviations: MSCN = Mean segment copy number; TPM = Transcripts per Million mapped reads.



235

236 **Supplementary Figure 5. Procedure for fitting a multiple logistic regression model via**  
 237 **coefficient-penalized maximum likelihood estimation.** The procedure with cross validation  
 238 was implemented using the R package glmnet. Area under the curve (AUC) was implemented  
 239 using the AUC package. Implementation details are available in Supplementary file 2. (1) The  
 240 first step is to define the objective function – in this case, the negative binomial log-likelihood –  
 241 and to define an approximation/optimization method – in this case, coordinate descent. (2-4)  
 242 Next, the value of lambda, a term that penalizes model coefficients, is selected by training an  
 243 array of models across a grid of lambda values and selecting the model with the fewest number  
 244 of terms within 1 standard error of the model with the lowest misclassification error using leave-  
 245 one-out cross validation. (5) The Area Under the Curve (AUC) is calculated for each model by  
 246 testing the ability of each model to correctly predict the outcome (either baseline or  
 247 overexpressed) given a set of input variables (e.g. DNA methylation  $\beta$  values at intragenic CpG  
 248 loci).

249

250



251  
 252 **Supplementary Figure 6. Colocalization of histones and transcription factors with CpG**  
 253 **sites that predict overexpression of *CBX2*.** (Top) Paired boxplots showing the CpG  
 254 methylation beta values, which range between 0-1, at each of 28 individual CpG loci for tumors  
 255 that express baseline levels of or overexpress *CBX2*. (Middle) Each row of the black-and-white  
 256 matrix represents 1 of 7 different ChIP-seq experiments from MCF7 cells in which a direct  
 257 overlap (black squares) between a CpG site and a ChIP-seq peak was identified. These 7 ChIP-  
 258 seq experiments were manually selected for purposes of interpretability from 14 ChIP-seq  
 259 experiments that overlapped with the *CBX2* locus. The chromatin type or transcription factor is  
 260 listed along the left-hand side of the matrix, and major chromatin features, such as enhancers  
 261 (Enh.), promoters (Pro.), and repressive (Repr.) marks, are indicated in large text. Each of the 28  
 262 columns represents a different CpG locus within the gene body of the *CBX2* gene (defined as the  
 263 beginning of the TSS1500 to the end of the 3' UTR). The model coefficient with the largest  
 264 absolute value is shown adjacent to the rightmost thin black line. (Bottom) The two thin black  
 265 lines demarcate the position of the 4 CpG sites within intron 2 and indicate the physical position  
 266 of these intronic CpG sites within the *CBX2* locus. Additional regions within the *CBX2* gene  
 267 (length = 11,352 bases, including the TSS1500) are annotated in the gene model, which was  
 268 obtained from the UCSC genome browser. Asterisks represent q values from a Wilcoxon rank-  
 269 sum test between the beta values at each of the 28 loci. \*\*\* =  $q < 0.0001$ , \*\* =  $q < 0.001$ , \* =  $q <$   
 270 0.01.

271



272  
 273 **Supplementary Figure 7. Expression of *CBX2* across the 5 distinct subtypes of breast**  
 274 **carcinoma.** The 110 tumors used in this study were grouped into 5 molecular subtypes, inferred  
 275 using the AIMS algorithm on the gene expression data derived from each tumor, and are shown  
 276 along the x axis. The subtypes are ordered from least to most aggressive, moving from left to  
 277 right. The proportion of tumors that overexpressed *CBX2* within each subtype are shown in dark  
 278 blue, while tumors that express baseline levels of *CBX2* are shown in light blue. The proportion  
 279 of tumors that overexpress *CBX2* correlates with the aggressiveness of the tumor subtype. A two-  
 280 sided multinomial exact test was used to check for the enrichment of tumors that overexpress  
 281 *CBX2* within the five breast tumor subtypes ( $p = 1.149 \times 10^{-7}$ ). *Post hoc* statistics were calculated  
 282 using Fisher's exact test (results shown as asterisks above each bar) and were adjusted for  
 283 multiple comparisons using the Benjamini-Hochberg method. Abbreviations: n.s. = not  
 284 significant, \* =  $p < 0.05$ , \*\*\* =  $p < 0.001$ .

285



286

287 **Supplementary Figure 8. Association between high-impact cancer-associated mutations**  
 288 **and the overexpression of oncogene candidates.** Each column represents one of 5 oncogene  
 289 candidates, and each row represents a mutation in a known oncogene or tumor suppressor.  
 290 Fisher's exact test was performed for each relationship, and an odds ratio and p-value were  
 291 obtained when possible. Blue indicates that overexpression of the OC and the presence of a  
 292 mutation were likely to co-occur in the same individual, while red indicates that overexpression  
 293 of the OC and oncogenic mutations were mutually exclusive. The frequency of these mutations  
 294 in the 50 individuals who harbored them are shown as a bar graph. Dark grey boxes indicate the  
 295 inability to compute an odds ratio due to the presence of a 0 value in an element of the 2x2  
 296 contingency table.

297

298



299 **Supplementary Figure 9. Expression of *CBX2* across 53 healthy adult human tissues.** Figure  
 301 was generated from the GTEx website (<https://www.gtexportal.org/home/>) by searching for the  
 302 gene *CBX2*. Grey arrows, from left to right, indicate expression in mammary tissue, prostate, and  
 303 testes. Blue boxplots represent expression values from males, and red boxplots represent  
 304 expression values from females. The entire GTEx dataset of 53 tissues, shown here for *CBX2*,  
 305 includes expression values generated from 8,555 individual samples, which were obtained from  
 306 544 donors.

307

308



309

310 **Supplementary Figure 10. The top five oncogene candidates identified by oncomix using**  
 311 **RNA-sequencing data from lung adenocarcinoma and adjacent normal lung tissue. A)** The  
 312 distribution of the oncomix scores is colored by a selectivity index (SI) set at 0.99. Larger  
 313 oncomix scores correspond to genes that more closely resemble the profile of a theoretical  
 314 oncogene candidate. B) Superimposed histograms of expression values from tumor (teal) and  
 315 adjacent normal (red) samples for the 5 genes with the highest oncomix score and a selectivity  
 316 index greater than 0.99. The best fitting mixture model is shown for each selected gene. The  
 317 HUGO gene symbol for each gene is displayed for each histogram. A theoretical model for an  
 318 ideal oncogene candidate is shown in the upper left and includes some of the summary statistics  
 319 that were used to compute the oncomix score. The y-axis represents density and the x-axis  
 320 represents  $\log_2(\text{TPM} + 1)$  reads. Abbreviations: T = primary breast tumor, N = adjacent normal  
 321 breast tissue, TPM = Transcripts Per Million reads.

322



323

324 **Supplementary Figure 11. The top five oncogene candidates identified by oncomix using**  
 325 **RNA-sequencing data from endometrial carcinoma and adjacent normal endometrial**  
 326 **tissue.** A) The distribution of the oncomix scores is colored by a selectivity index (SI) set at 0.99.  
 327 Larger oncomix scores correspond to genes that more closely resemble the profile of a  
 328 theoretical oncogene candidate. B) Superimposed histograms of expression values from tumor  
 329 (teal) and adjacent normal (red) samples for the 5 genes with the highest oncomix score and a  
 330 selectivity index greater than 0.99. The best fitting mixture model is shown for each selected  
 331 gene. The HUGO gene symbol for each gene is displayed for each histogram. A theoretical  
 332 model for an ideal oncogene candidate is shown in the upper left and includes some of the  
 333 summary statistics that were used to compute the oncomix score. The y-axis represents density  
 334 and the x-axis represents  $\log_2(\text{TPM} + 1)$  reads. Abbreviations: T = primary breast tumor, N =  
 335 adjacent normal breast tissue, TPM = Transcripts Per Million reads.

336



337

338 **Supplementary Figure 12. The top five oncogene candidates identified by oncomix using**  
 339 **RNA-sequencing data from prostate adenocarcinoma and adjacent normal prostate tissue.**

340 A) The distribution of the oncomix scores is colored by a selectivity index (SI) set at 0.99.

341 Larger oncomix scores correspond to genes that more closely resemble the profile of a

342 theoretical oncogene candidate. B) Superimposed histograms of expression values from tumor

343 (teal) and adjacent normal (red) samples for the 5 genes with the highest oncomix score and a

344 selectivity index greater than 0.99. The best fitting mixture model is shown for each selected

345 gene. The HUGO gene symbol for each gene is displayed for each histogram. A theoretical

346 model for an ideal oncogene candidate is shown in the upper left and includes some of the

347 summary statistics that were used to compute the oncomix score. The y-axis represents density

348 and the x-axis represents  $\log_2(\text{TPM} + 1)$  reads. Abbreviations: T = primary breast tumor, N =

349 adjacent normal breast tissue, TPM = Transcripts Per Million reads.

350



351

352 **Supplementary Figure 13. Expression profiles of *CBX2* in four distinct tumor types and in**  
 353 **adjacent normal tissue.** The number of samples from each tumor type are shown. Rankings for  
 354 each dataset are among the genes that passed filters applied to the original breast cancer dataset  
 355 ( $0.2 > \pi_T$  &  $\pi_N > 0.8$ , selectivity index  $> 0.99$ ). OS = oncomix score.

356

357



358

359 **Supplementary Figure 14. Expression of oncogenes from the Cancer Gene Census within**  
 360 **normal adult tissue.** A) Each point in this violin plot represents a gene, and each gene was  
 361 grouped on the x-axis according to whether it was identified by oncomix. The y-axis represents  
 362 the percentage of tissues in GTEX that have a TPM > 1 for the gene. Prior studies have used a  
 363 threshold of 1 TPM to classify a gene as expressed or not<sup>15</sup>. P-value was calculated using  
 364 student's t-test (two-sided). B) Each column in the heatmap represents one of the 12 known  
 365 oncogenes identified by oncomix, and each row represents a tissue collected in GTEX. Each cell  
 366 in the heatmap represents a binary version of the median transcripts per million (TPM) value for  
 367 a gene across all tissues obtained from the GTEX database. The asterisks indicate genes that are  
 368 associated with mammalian embryogenesis in the literature as of March 2018 (see main text for  
 369 references).

370

371

372 **References**

- 373 1. Moon TK. The expectation-maximization algorithm. *IEEE Signal Process. Mag.* **96**, 47–60  
374 (1996).
- 375 2. Bamford S, Dawson E, Forbes S, Clements J, Pettett R, Dogan A, et al. The COSMIC  
376 (Catalogue of Somatic Mutations in Cancer) database and website. *Br. J. Cancer.* **2**, 355–358  
377 (2004).
- 378 3. Futreal PA, Coin L, Marshall M, Down T, Hubbard T, Wooster R, et al. A census of human  
379 cancer genes. *Nat. Rev. Cancer.* **4**, 177–183 (2004).
- 380 4. Salsi V, Zappavigna V. Hoxd13 and Hoxa13 directly control the expression of the EphA7  
381 ephrin tyrosine kinase receptor in developing limbs. *J. Biol. Chem.* **281**, 1992–1999 (2006).
- 382 5. Ellis P, Fagan BM, Magness ST, Hutton S, Taranova O, Hayashi S, et al. SOX2, a persistent  
383 marker for multipotential neural stem cells derived from embryonic stem cells, the embryo or the  
384 adult. *Dev. Neurosci.* **26**, 148–165 (2004).
- 385 6. Bucher K, Sofroniew M V., Pannell R, Impey H, Smith AJH, Torres EM, et al. The T cell  
386 oncogene Tal2 is necessary for normal development of the mouse brain. *Dev. Biol.* **227**, 533–544  
387 (2000).
- 388 7. Zhang J, Tam W-L, Tong GQ, Wu Q, Chan H-Y, Soh B-S, et al. Sall4 modulates embryonic  
389 stem cell pluripotency and early embryonic development by the transcriptional regulation of  
390 Pou5f1. *Nat. Cell Biol.* **8**, 1114–1123 (2006).
- 391 8. Venables WN, Ripley BD. Modern Applied Statistics with S. 4th ed. 2002.
- 392 9. Triche T. FDb.InfiniumMethylation.hg19: Annotation package for Illumina Infinium DNA  
393 methylation probes. **R package**, (2014).
- 394 10. Lawrence M, Gentleman R, Carey V. rtracklayer: An R package for interfacing with genome  
395 browsers. *Bioinformatics.* **25**, 1841–1842 (2009).
- 396 11. Bioconductor. TxDb.Hsapiens.UCSC.hg38.knownGene: Annotation package for TxDb. **R**  
397 **package**, (2016).
- 398 12. Paquet ER, Hallett MT. Absolute assignment of breast cancer intrinsic molecular subtype. *J.*  
399 *Natl. Cancer Inst.* **107**, 1–9 (2015).
- 400 13. Landt SG, Marinov GK, Kundaje A, Kheradpour P, Pauli F, Batzoglou S, et al. ChIP-seq  
401 guidelines and practices of the ENCODE and modENCODE consortia. *Genome Res.* **22**, 1813–  
402 1831 (2012).
- 403 14. The ENCODE Project Consortium. An integrated encyclopedia of DNA elements in the  
404 human genome. *Nature.* **489**, 57–74 (2012).
- 405 15. Liu P, Sanalkumar R, Bresnick EH, Keleş S, Dewey CN. Integrative analysis with ChIP-seq  
406 advances the limits of transcript quantification from RNA-seq. *Genome Res.* **26**, 1124–1133  
407 (2016).

408
